# Supplementary material for: From inverse sandwich Ta2B7+ and Ta2B8 to spherical trihedral Ta3B12−: prediction of the smallest metallo-borospherene
Source: PubMed Central journal article supplement — RSC Adv. 2020 Aug 11;10(49):29320–5. doi: 10.1039/d0ra05570k (PMC9055930; doi:10.1039/d0ra05570k), 2020-08-11
Supplement: RA-010-D0RA05570K-s001.pdf [file RA-010-D0RA05570K-s001.pdf]

# From Inverse Sandwich $Ta_2B_7^+$ and $Ta_2B_8$ to Spherical Trihedral $Ta_3B_{12}^-$ : Prediction of The Smallest Metallo-Borospherene

Yu Zhang, Xiao-Yun Zhao, Miao Yan, and Si-Dian Li\*

## Supporting Information

**Fig. S1** Low-lying isomers of  $Ta_2B_7^+$  at PBE0, BP86, and CCSD(T) levels.

**Fig. S2** Low-lying isomers of  $Ta_2B_8$  at PBE0, BP86, and CCSD(T) levels.

**Fig. S3** Optimized structures of the lowest-lying  $C_{2v}$   $Ta_3B_{10}^+$ ,  $C_s$   $Ta_3B_{10}^-$ , and  $C_s$   $Ta_3B_{11}^-$  at PBE0 level.

**Fig. S4** Low-lying isomers of  $Ta_3B_{12}^-$  at PBE0, BP86, and CCSD(T) levels.

**Fig. S5** Optimized structures of  $D_{3h}$   $V_3B_{12}^-$  and  $D_{3h}$   $NbB_{12}^-$ .<sup>‡</sup>

**Fig. S6** MD simulations of  $Ta_2B_7^+$  (**1**),  $Ta_2B_8$  (**2**), and  $Ta_3B_{12}^-$  (**3**) at 1200 K, 700 K, and 1200 K.

**Fig. S7** Delocalized  $\sigma$ - and  $\pi$ -CMOs of  $D_{6h}$   $Ta_2B_6$  and  $Ta_2B_7^+$  (**1**)

**Fig. S8** Ring current maps of (a)  $D_{7h}$   $Ta_2B_7^+$  (**1**), (b)  $D_{8h}$   $Ta_2B_8$  (**2**), and (c)  $D_{3h}$   $Ta_3B_{12}^-$  (**3**).

**Fig. S9** Simulated IR, Raman, and UV-vis spectra of (a)  $Ta_2B_7^+$  (**1**) and (b)  $Ta_2B_8$  (**2**) at PBE0.

**Table S1** Optimized coordinates of (a)  $D_{7h}$   $Ta_2B_7^+$  (**1**), (b)  $D_{8h}$   $Ta_2B_8$  (**2**), (c)  $D_{3h}$   $Ta_3B_{12}^-$  (**3**) at PBE0.

**Table S2** Optimized structures and coordinates (in Å) of the second, third, and fourth lowest-lying isomers of  $Ta_3B_{12}^-$  at PBE0//B/aug-cc-pVTZ/Ta/Stuttgart+2f1g level.

**Fig. S1** Low-lying isomers of  $\text{Ta}_2\text{B}_7^+$  at PBE0, BP86 (in parentheses), and CCSD(T) (in square brackets) levels, with the relative energies indicated in eV.

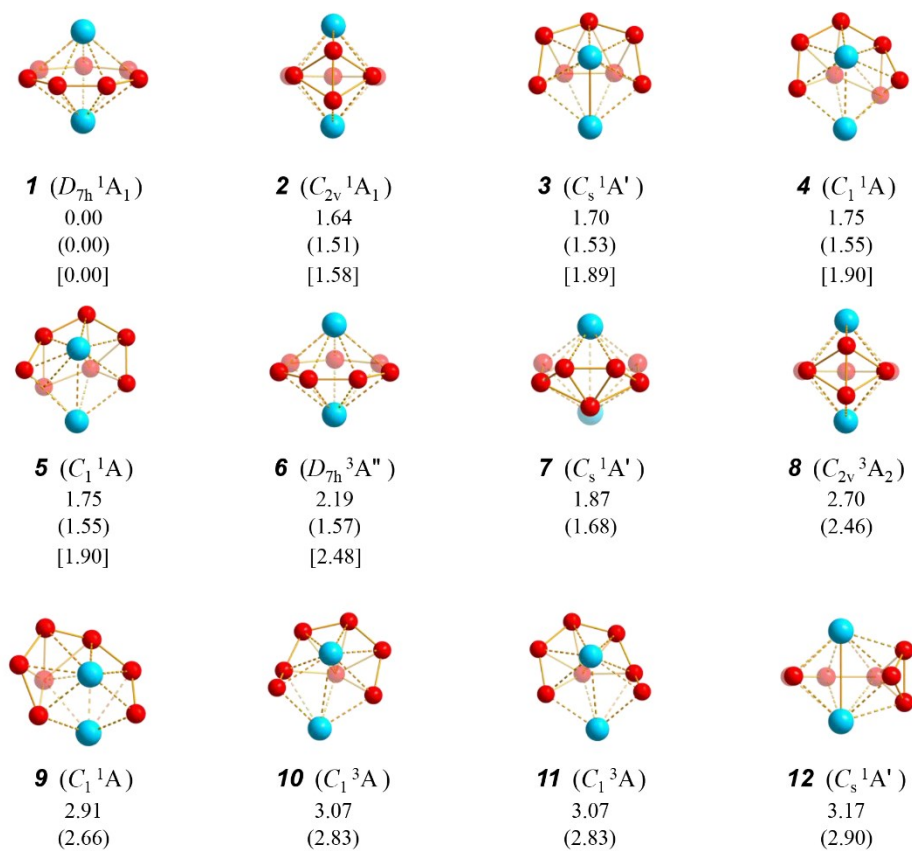

$\Delta E$  PBE0 B/ aug-cc-pVTZ/ Ta/Stuttgart(2f1g) , () at BP86 B/ aug-cc-pVTZ/ Ta/Stuttgart(2f1g) , [] at CCSD(T) B/ aug-cc-pVTZ/ Ta/Stuttgart(2f1g)

**Fig. S2** Low-lying isomers of Ta<sub>2</sub>B<sub>8</sub> at PBE0, BP86 (in parentheses), and CCSD(T) (in square brackets) levels, with the relative energies indicated in eV.

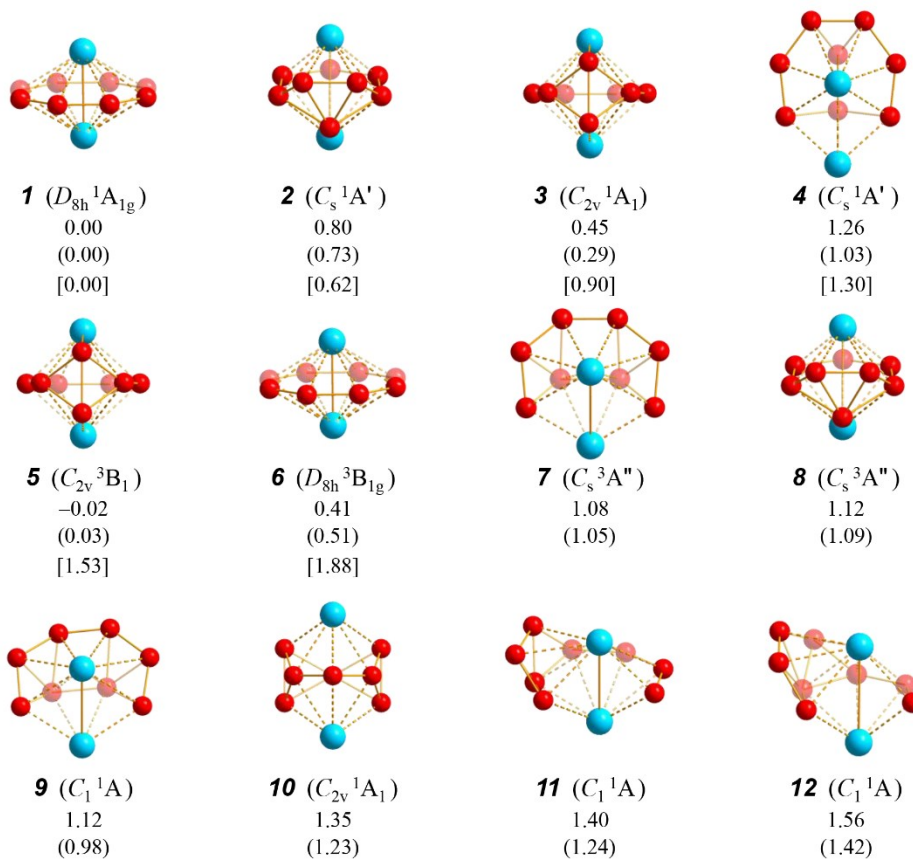

$\Delta E$ : PBE0 B/aug-cc-pVTZ/Ta/Stuttgart(2f1g), () at BP86 B/aug-cc-pVTZ/Ta/Stuttgart(2f1g), [ ] at CCSD(T) B/aug-cc-pVTZ/Ta/Stuttgart(2f1g)

**Fig. S3** Optimized structures of the lowest-lying  $C_{2v}$   $Ta_3B_{10}^+$ ,  $C_s$   $Ta_3B_{10}^-$ , and  $C_s$   $Ta_3B_{11}^-$  at PBE0//B/aug-cc-pVTZ/Ta/Stuttgart+2f1g level.

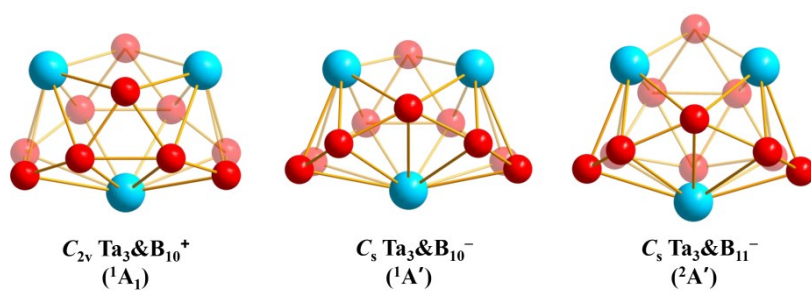

**Fig. S4** Low-lying isomers of  $\text{Ta}_3\text{B}_{12}^-$  at PBE0, BP86 (in parentheses), and CCSD(T) (in square brackets) levels, with the relative energies indicated in eV.

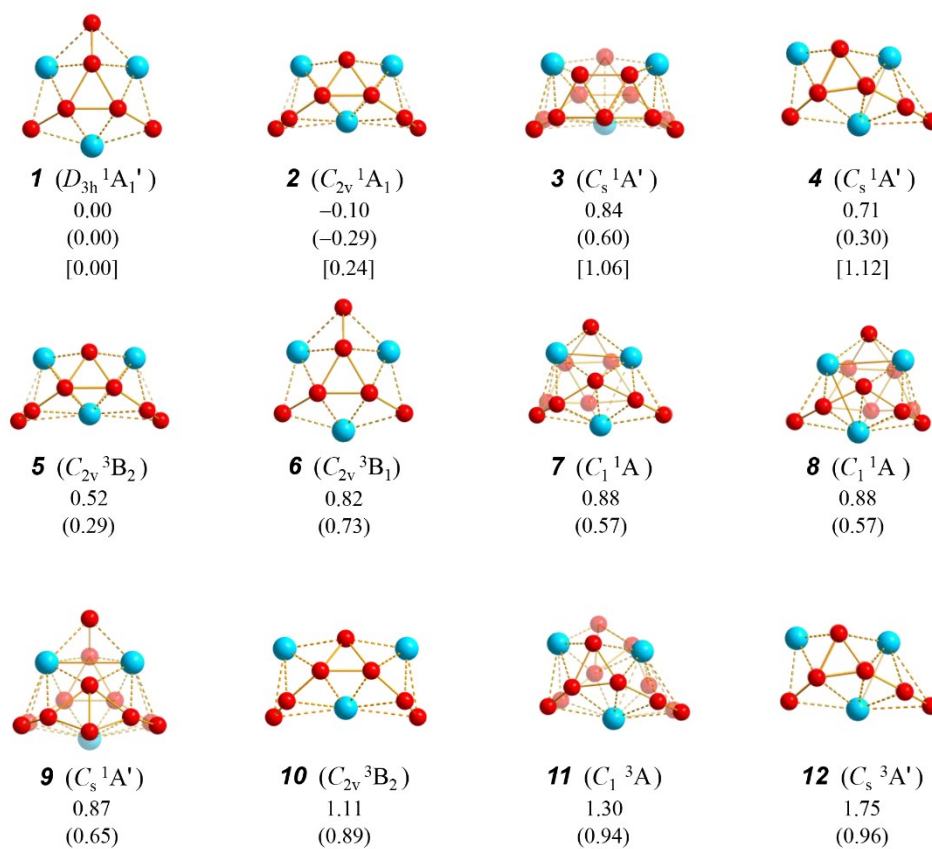

$\Delta E$  PBE0 B/aug-cc-pVTZ/Ta/Stuttgart(2fg), () at BP86 B/aug-cc-pVTZ/Ta/Stuttgart(2fg), [ ] at CCSD(T) B/aug-cc-pVTZ/Ta/Stuttgart(2fg)

**Fig. S5** Optimized structures of  $D_{3h}$   $V_3B_{12}^-$  and  $D_{3h}$   $Nb_3B_{12}^-$ .

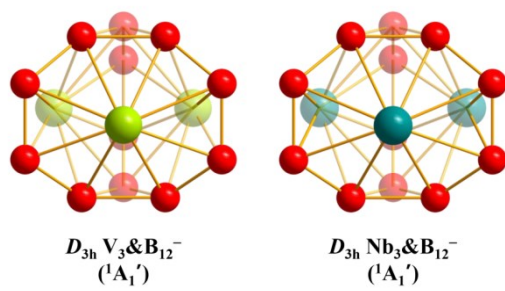

**Fig. S6** MD simulations of  $\text{Ta}_2\text{B}_7^+$  (**1**),  $\text{Ta}_2\text{B}_8$  (**2**), and  $\text{Ta}_3\text{B}_{12}^-$  (**3**) at 1200 K, 700 K, and 1200 K, respectively, with the calculated average root-mean-square-deviations (RMSD) and maximum bond length deviations (MAXD) indicated.

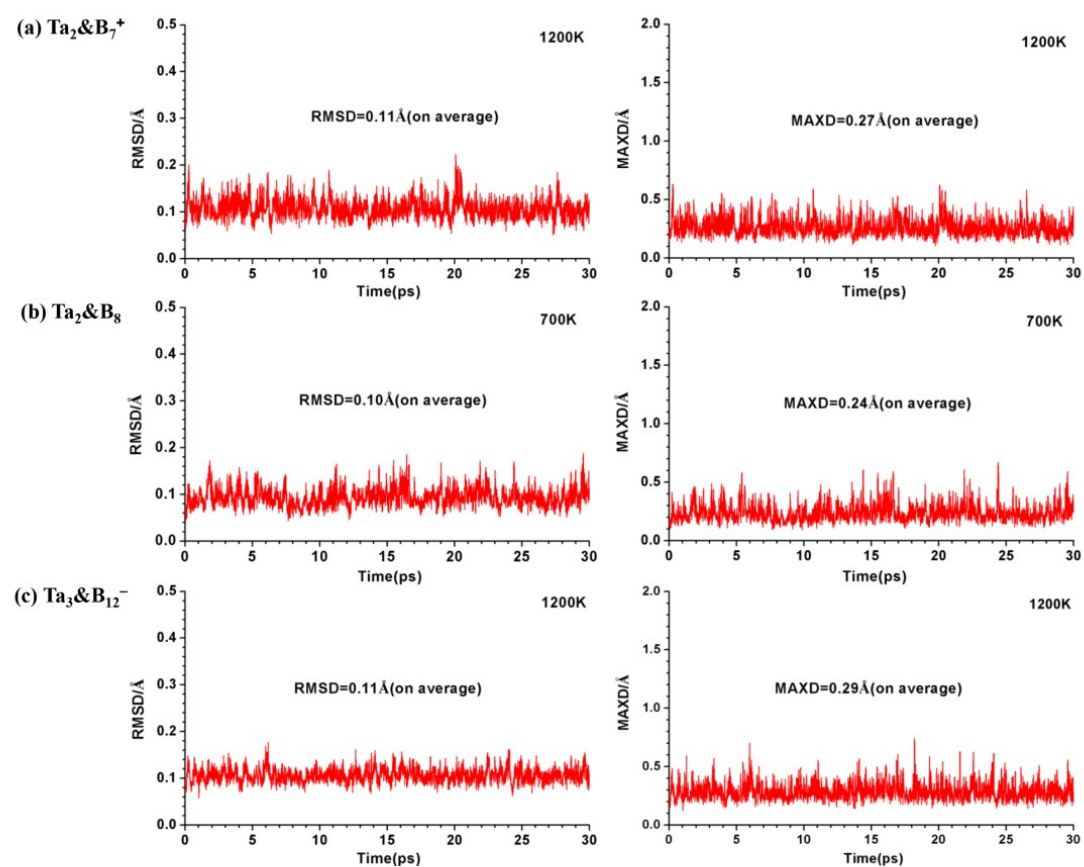

**Fig. S7** Delocalized  $\sigma$ - and  $\pi$ -CMOs of (a)  $D_{6h}$   $Ta_2B_6$  and (b)  $Ta_2B_7^+$  (**1**) at PBE0//B/aug-cc-pVTZ/Ta/Stuttgart+2f1g level.

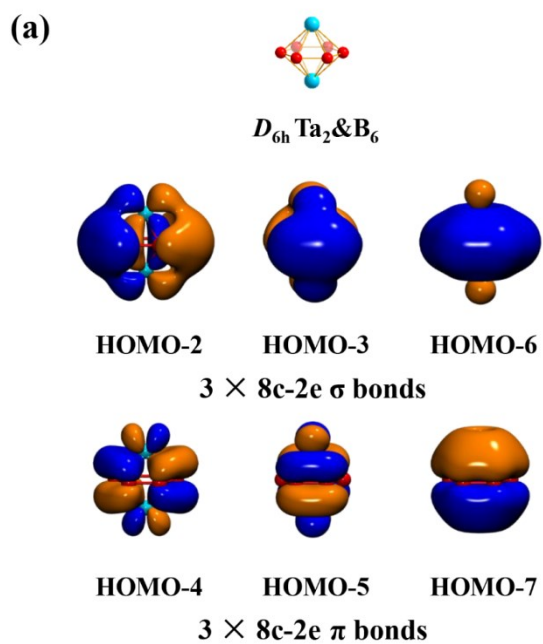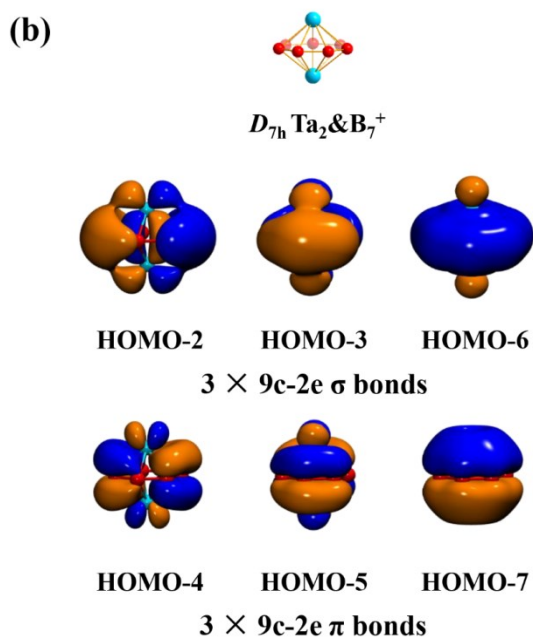



**Fig. S8** Top and side views of the ring current maps of (a)  $D_{7h}$   $Ta_2B_7^+$  (**1**), (b)  $D_{8h}$   $Ta_2B_8$  (**2**), and (c)  $D_{3h}$   $Ta_3B_{12}^-$  (**3**) with the iso-surface value of 0.05. The external magnetic field  $\vec{B}$  is applied in the vertical direction parallel to the  $C_7$  axis of  $Ta_2B_7^+$  (**1**),  $C_8$  axis of  $Ta_2B_8$  (**2**), and  $C_2$  axis of  $Ta_3B_{12}^-$  (**3**), with the induced current vectors represented by red arrows on the iso-surfaces.

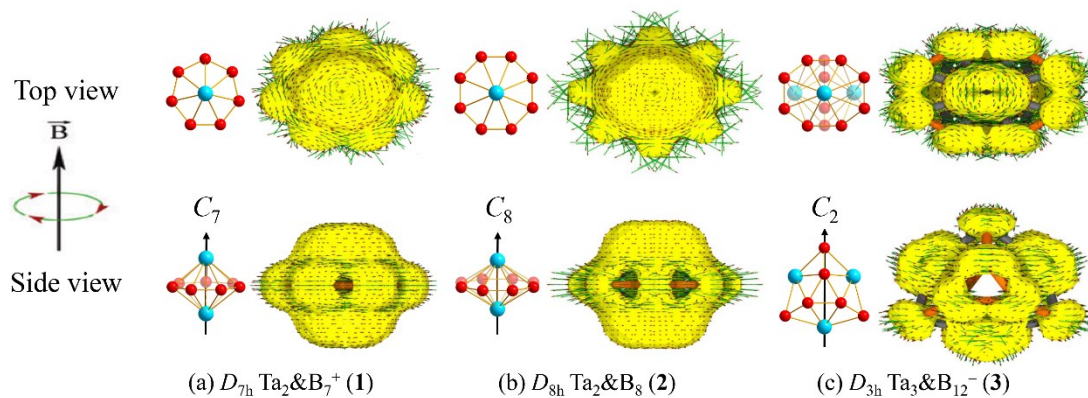

**Fig. S9** Simulated IR, Raman, and UV-vis spectra of (a)  $\text{Ta}_2\text{B}_7^+$  (**1**) and (b)  $\text{Ta}_2\text{B}_8$  (**2**) at PBE0//B/aug-cc-pVTZ/Ta/Stuttgart+2f1g level.

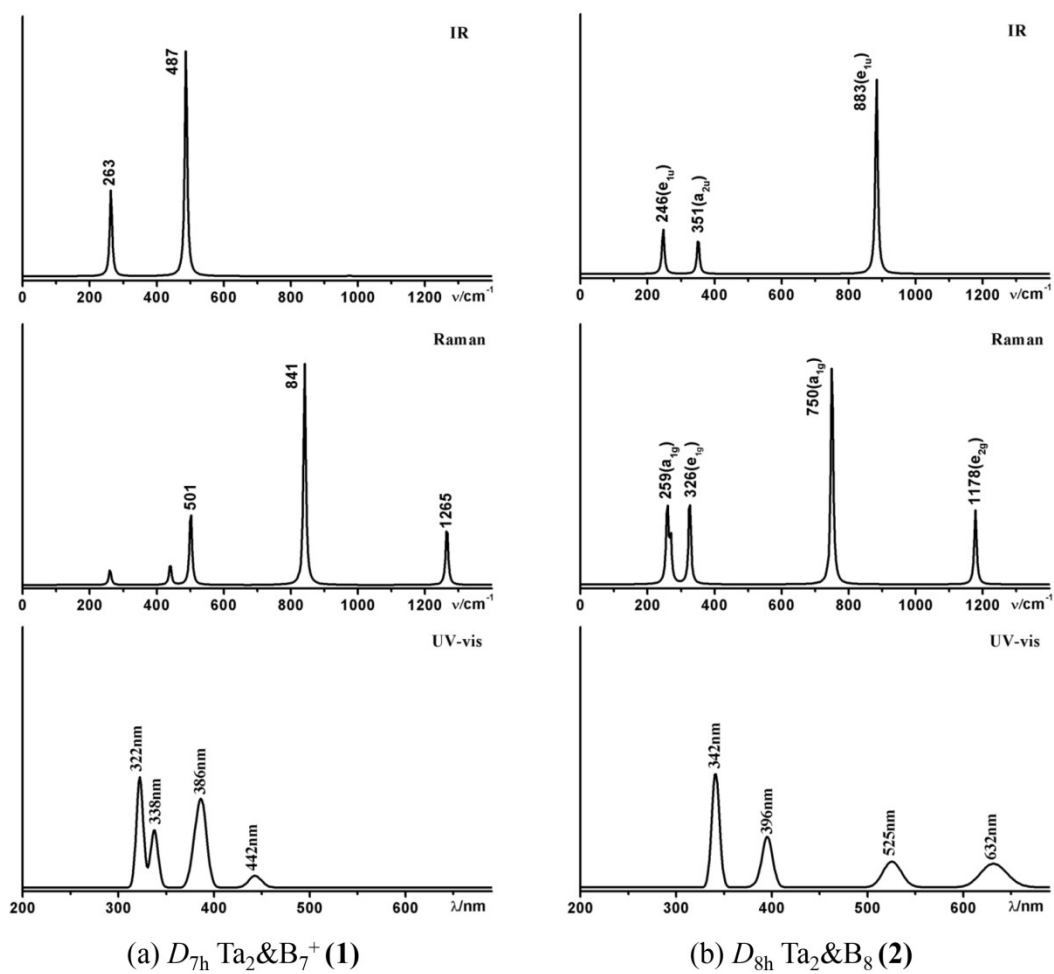

**Table S1** Optimized coordinates (in Å) of (a)  $D_{7h}$  Ta<sub>2</sub>B<sub>7</sub><sup>+</sup> (**1**), (b)  $D_{8h}$  Ta<sub>2</sub>B<sub>8</sub> (**2**), and (c)  $D_{3h}$  Ta<sub>3</sub>B<sub>12</sub><sup>-</sup> (**3**) at PBE0//B/aug-cc-pVTZ/Ta/Stuttgart+2f1g level.

(a)  $D_{7h}$  Ta<sub>2</sub>B<sub>7</sub><sup>+</sup> (**1**)

|    |             |             |             |
|----|-------------|-------------|-------------|
| B  | 0.00000000  | 1.77240700  | 0.00000000  |
| B  | 1.38572300  | 1.10507800  | 0.00000000  |
| B  | 1.72796900  | -0.39439800 | 0.00000000  |
| B  | 0.76901900  | -1.59688300 | 0.00000000  |
| B  | -0.76901900 | -1.59688300 | 0.00000000  |
| B  | -1.72796900 | -0.39439800 | 0.00000000  |
| B  | -1.38572300 | 1.10507800  | 0.00000000  |
| Ta | 0.00000000  | 0.00000000  | 1.43155300  |
| Ta | 0.00000000  | 0.00000000  | -1.43155300 |

(b)  $D_{8h}$  Ta<sub>2</sub>B<sub>8</sub> (**2**)

|    |             |             |             |
|----|-------------|-------------|-------------|
| B  | 0.00000000  | 2.01204000  | 0.00000000  |
| B  | -1.42272700 | 1.42272700  | 0.00000000  |
| B  | 1.42272700  | 1.42272700  | 0.00000000  |
| B  | -2.01204000 | 0.00000000  | 0.00000000  |
| B  | 0.00000000  | -2.01204000 | 0.00000000  |
| B  | 2.01204000  | 0.00000000  | 0.00000000  |
| B  | -1.42272700 | -1.42272700 | 0.00000000  |
| B  | 1.42272700  | -1.42272700 | 0.00000000  |
| Ta | 0.00000000  | 0.00000000  | 1.26069100  |
| Ta | 0.00000000  | 0.00000000  | -1.26069100 |

(c)  $D_{3h}$  Ta<sub>3</sub>B<sub>12</sub><sup>-</sup> (**3**)

|    |             |             |             |
|----|-------------|-------------|-------------|
| Ta | 0.00000000  | 1.75299000  | 0.00000000  |
| Ta | -1.51813400 | -0.87649500 | 0.00000000  |
| B  | -0.86896500 | 0.50169700  | 1.66873400  |
| B  | -2.04920100 | 1.18310700  | -0.79218300 |
| B  | 2.04920100  | 1.18310700  | 0.79218300  |
| B  | 0.00000000  | -2.36621400 | -0.79218300 |
| B  | -0.86896500 | 0.50169700  | -1.66873400 |
| Ta | 1.51813400  | -0.87649500 | 0.00000000  |
| B  | -2.04920100 | 1.18310700  | 0.79218300  |
| B  | 0.86896500  | 0.50169700  | -1.66873400 |
| B  | 2.04920100  | 1.18310700  | -0.79218300 |
| B  | 0.00000000  | -1.00339400 | 1.66873400  |
| B  | 0.86896500  | 0.50169700  | 1.66873400  |
| B  | 0.00000000  | -1.00339400 | -1.66873400 |
| B  | 0.00000000  | -2.36621400 | 0.79218300  |

**Table S2** Optimized structures and coordinates (in Å) of the second (a), third (b), and fourth (c) lowest-lying isomers of  $\text{Ta}_3\text{B}_{12}^-$  at PBE0//B/aug-cc-pVTZ/Ta/Stuttgart+2f1g level.

(a)  $C_{2v}$   $\text{Ta}_3\text{B}_{12}^-$  ( $^1A_1$ )

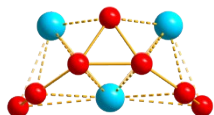

|    |             |             |             |
|----|-------------|-------------|-------------|
| Ta | 0.00000000  | -0.00000000 | -1.18138959 |
| Ta | 1.61200407  | -0.00000000 | 0.79548931  |
| B  | -0.87388535 | 2.05490675  | -0.24101743 |
| B  | 0.87388535  | 2.05490675  | -0.24101743 |
| B  | 2.04989728  | 1.41510588  | -1.05430960 |
| B  | -2.04989728 | 1.41510588  | -1.05430960 |
| B  | -0.87388535 | -2.05490675 | -0.24101743 |
| B  | 2.04989728  | -1.41510588 | -1.05430960 |
| B  | 2.52818198  | -0.00000000 | -1.42127888 |
| Ta | -1.61200407 | -0.00000000 | 0.79548931  |
| B  | 0.00000000  | 1.50686895  | 1.02193303  |
| B  | 0.87388535  | -2.05490675 | -0.24101743 |
| B  | -2.04989728 | -1.41510588 | -1.05430960 |
| B  | 0.00000000  | -1.50686895 | 1.02193303  |
| B  | -2.52818198 | -0.00000000 | -1.42127888 |

(b)  $C_s Ta_3B_{12}^- (^1A')$

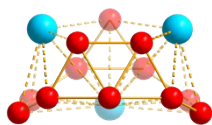

|    |             |             |             |
|----|-------------|-------------|-------------|
| B  | -1.97828846 | 0.00902592  | -0.87616371 |
| B  | 1.47502860  | -1.16386702 | -1.62116014 |
| B  | -1.24711597 | 1.20470515  | 0.00000000  |
| B  | 0.07624476  | -1.39914596 | -2.37875132 |
| B  | -1.97828846 | 0.00902592  | 0.87616371  |
| B  | -1.36473271 | -0.90129011 | -2.05961627 |
| B  | 2.08867015  | -1.23110912 | 0.00000000  |
| B  | 1.92055198  | 0.23141641  | -0.83424377 |
| B  | 1.47502860  | -1.16386702 | 1.62116014  |
| B  | 1.92055198  | 0.23141641  | 0.83424377  |
| B  | 0.07624476  | -1.39914596 | 2.37875132  |
| B  | -1.36473271 | -0.90129011 | 2.05961627  |
| Ta | 0.05413926  | 0.80620507  | -1.76350194 |
| Ta | 0.05413926  | 0.80620507  | 1.76350194  |
| Ta | -0.18356362 | -1.16897688 | 0.00000000  |

(c)  $C_s Ta_3B_{12}^- (^1A')$

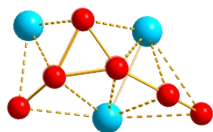

|    |             |             |             |
|----|-------------|-------------|-------------|
| B  | -0.90132581 | 0.74945409  | -1.77220111 |
| B  | -0.77430741 | -0.90645969 | -1.56299986 |
| B  | 0.51482107  | -0.08179237 | -2.16804413 |
| B  | 2.01447036  | 0.06524607  | -1.90556231 |
| B  | 3.00927217  | 0.18263596  | -0.75456444 |
| B  | 3.00927217  | 0.18263596  | 0.75456444  |
| B  | 2.01447036  | 0.06524607  | 1.90556231  |
| B  | 0.51482107  | -0.08179237 | 2.16804413  |
| B  | -0.77430741 | -0.90645969 | 1.56299986  |
| B  | -0.90132581 | 0.74945409  | 1.77220111  |
| B  | -1.45299833 | 1.84115969  | 0.77559177  |
| B  | -1.45299833 | 1.84115969  | -0.77559177 |
| Ta | 0.78855315  | 1.21481144  | 0.00000000  |
| Ta | 0.89842378  | -1.24995120 | 0.00000000  |
| Ta | -2.01710461 | -0.21831828 | 0.00000000  |
